# Supplementary material for: Sodium ion conductivities in Na2O–Sm2O3–SiO2 ceramics
Source: Royal Society of Chemistry journal article supplement (doi:10.1039/d4eb00021h), 2025-01-01
Supplement: d4eb00021h1.pdf [file d4eb00021h1.pdf]

## Electronic Supporting Information

### Sodium ion conductivities in $\text{Na}_2\text{O-Sm}_2\text{O}_3\text{-SiO}_2$ Ceramics

Abinaya Sivakumaran<sup>a</sup>, Vishnu Surendran<sup>a</sup>, Shantel Butler<sup>d</sup>, Samuel Reid<sup>b</sup>, and Venkataraman Thangadurai<sup>a\*,c</sup>

<sup>a</sup>Department of Chemistry, University of Calgary, Calgary, AB T2N 1N4, Canada

<sup>b</sup>Geometric Energy Corporation, 1400–3507 Ave SW, Calgary, Alberta, T2P 3N9, Canada

<sup>c</sup>School of Chemistry, University of St Andrews, KY16 9AJ, United Kingdom

<sup>d</sup>Elektra Industries, 2700-225 6 Ave SW, Calgary, AB, T2P 1N2, Canada

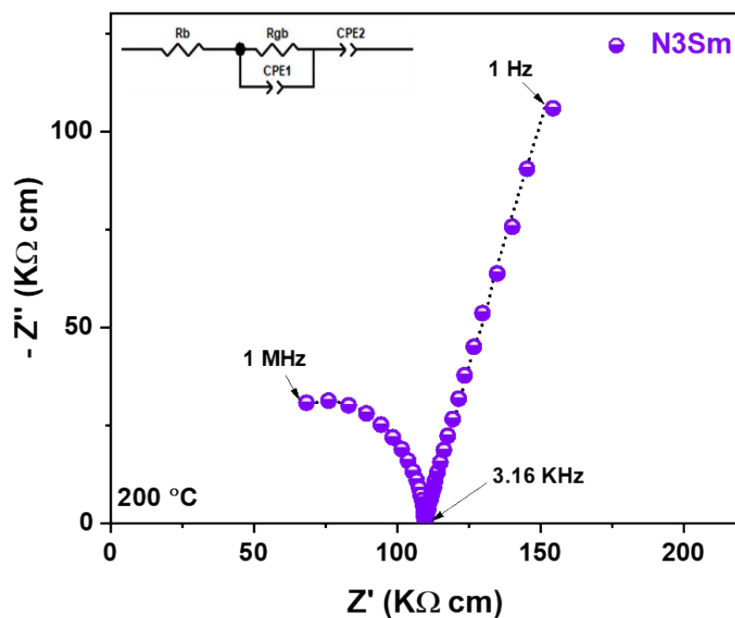

**Fig. S1** N3Sm impedance at 200 °C with fitted equivalent circuit in the inset.

| Compound | $R_b$ ( $\Omega$ ) | $R_{gb}$ ( $\Omega$ ) | CPE1 (F)               | C1 (F)                 |
|----------|--------------------|-----------------------|------------------------|------------------------|
| 5-N3Sm   | 61.59              | 446.2                 | $6.94 \times 10^{-9}$  | $1.64 \times 10^{-9}$  |
| 10-N3Sm  | 35.33              | 213.7                 | $3.03 \times 10^{-8}$  | $3.23 \times 10^{-9}$  |
| 15-N3Sm  | 23.19              | 159.8                 | $1.85 \times 10^{-8}$  | $3.02 \times 10^{-9}$  |
| 20-N3Sm  | 32.85              | 191.5                 | $1.02 \times 10^{-8}$  | $3.32 \times 10^{-9}$  |
| N5Sm     | 20.57              | 43.81                 | $3.35 \times 10^{-8}$  | $1.15 \times 10^{-9}$  |
| N3Sm     | 3257               | 5173                  | $7.84 \times 10^{-11}$ | $3.75 \times 10^{-11}$ |

**Table S1.** AC impedance data fitting results using suitable equivalent circuit elements.

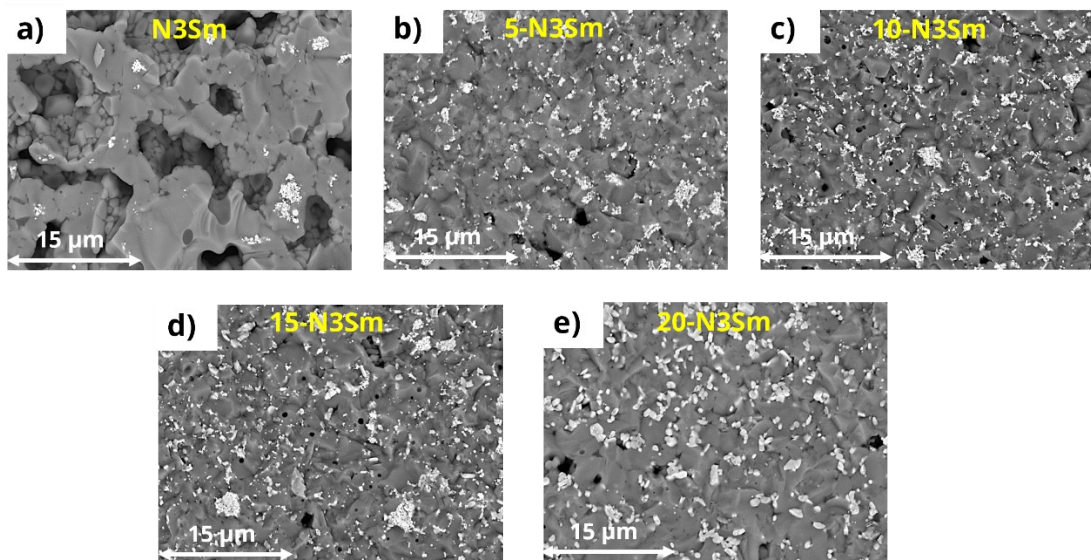

**Fig. S2** Cross-section SEM images of N3Sm, 5, 10, 15, and 20-N3Sm.

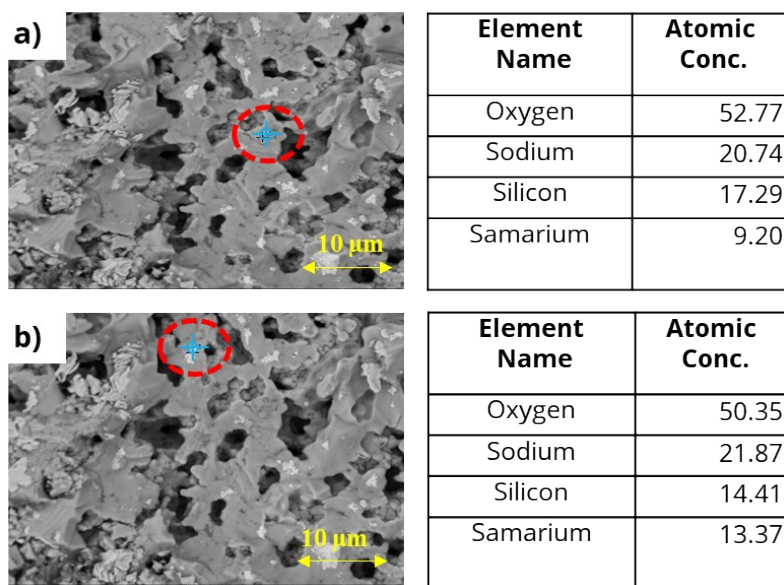

**Fig. S3** Spot EDX and their elemental ratio of N3Sm at two different spots as in a) and b).

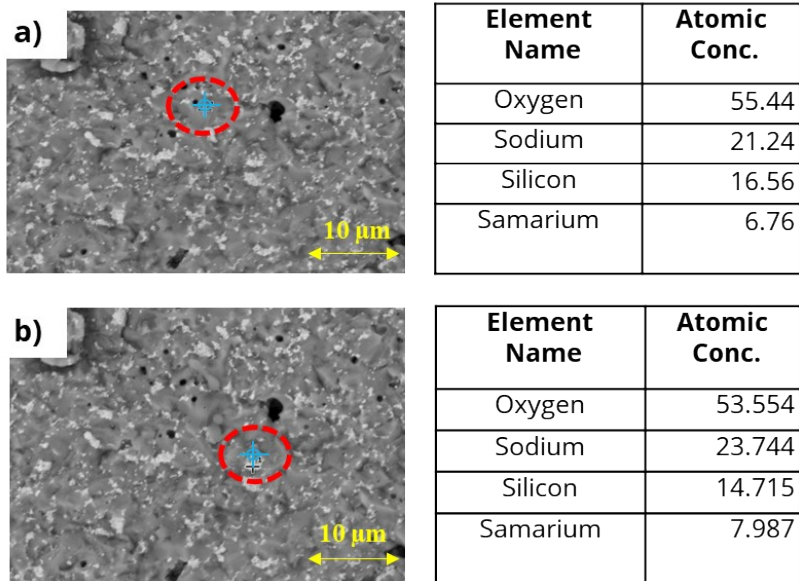

**Fig. S4** Spot EDX and their elemental ratio of 5-N3Sm at two different spots as in a) and b).

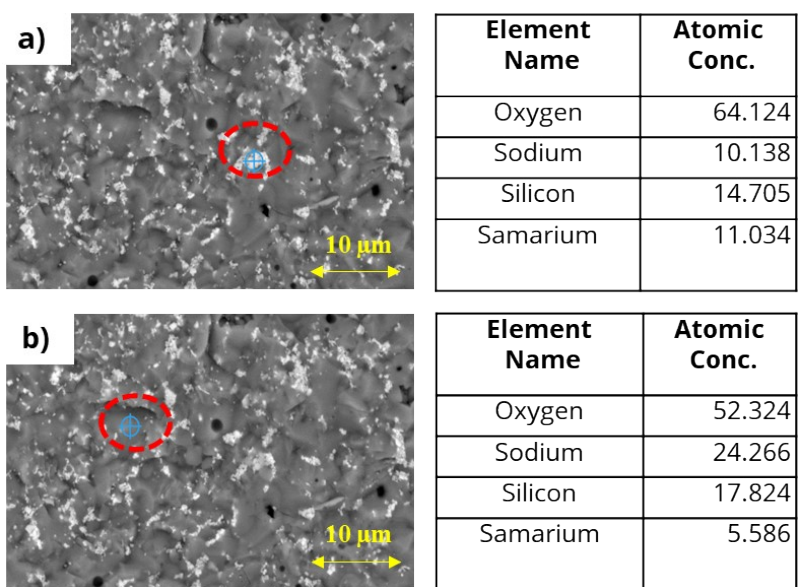

**Fig. S5** Spot EDX and their elemental ratio of 10-N3Sm at two different spots as in a) and b).

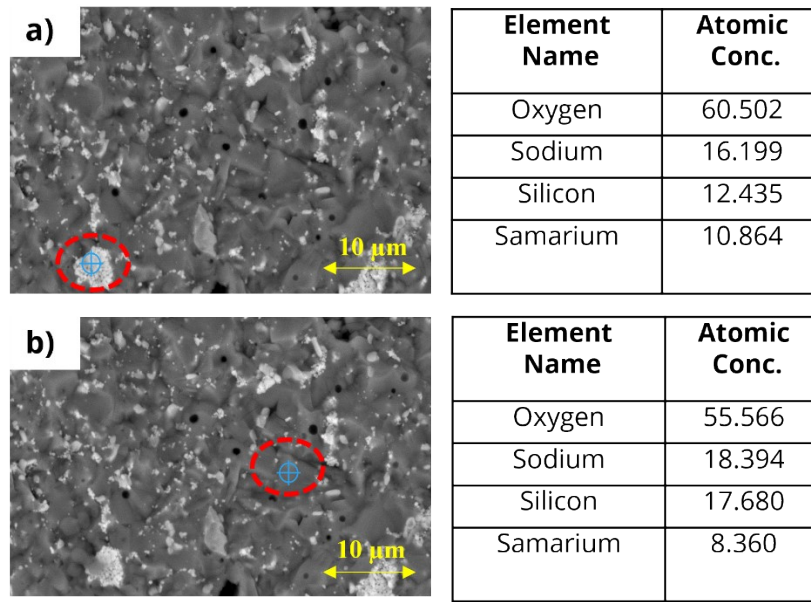

**Fig. S6** Spot EDX and their elemental ratio of 15-N3Sm at two different spots as in a) and b).

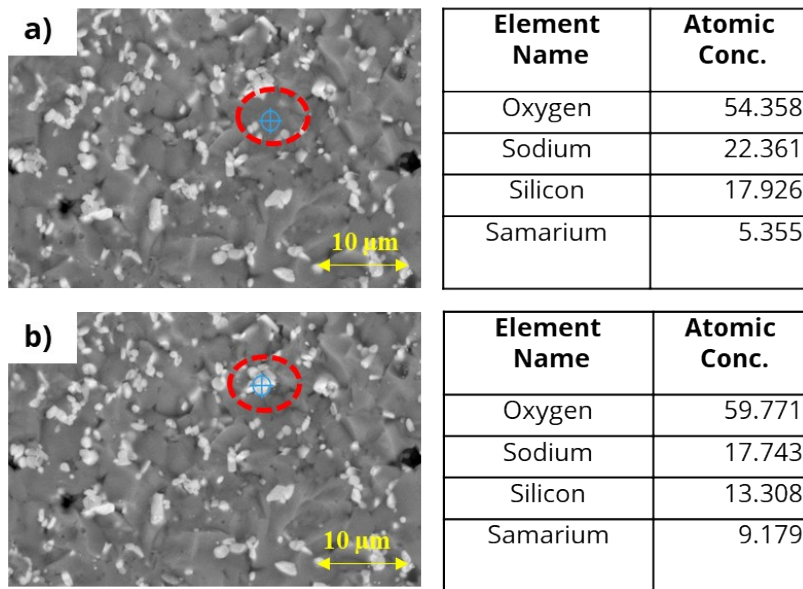

**Fig. S7** Spot EDX and their elemental ratio of 20-N3Sm at two different spots as in a) and b).

| Composition | Ionic conductivity ( $\sigma_i$ ) (S cm <sup>-1</sup> ) 25 °C | Density (g cm <sup>-3</sup> ) |
|-------------|---------------------------------------------------------------|-------------------------------|
| 5-N3Sm      | $1.07 \times 10^{-4}$                                         | 3.328                         |
| 10-N3Sm     | $3.51 \times 10^{-4}$                                         | 3.352                         |
| 15-N3Sm     | $9.42 \times 10^{-4}$                                         | 3.354                         |
| 20-N3Sm     | $3.82 \times 10^{-4}$                                         | 3.361                         |
| N5Sm        | $1.33 \times 10^{-3}$                                         | 3.417                         |

**Table S2.** Comparison table of ionic conductivity and density of all five compositions including 5 – 20-N3Sm and N5Sm.

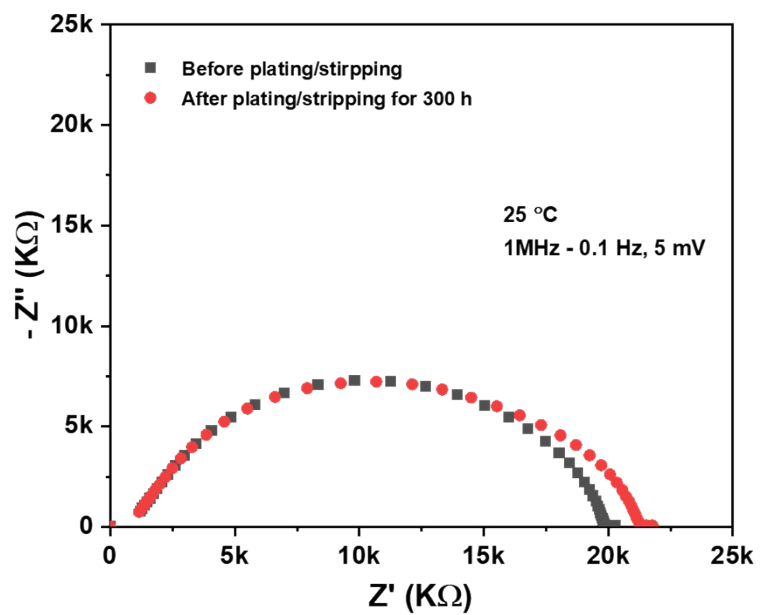

**Fig. S8** EIS taken before and after galvanostatic sodium plating/stripping experiments at  $0.05\text{mA cm}^{-2}$  for 300 h at RT.
